# Supplementary material
Source: publisher site journal article supplement (https://www.dovepress.com/article/444180)
Supplement: Supplementary file 1 [file get_supplementary_file.php]

# Supplementary 1: Perception and Attitude of Primary Health Care Physicians Toward Dermatologic Surgery

Dear Participants,

We appreciate your valuable input on this survey. Please answer the following questions with your real (Not ideal) answers.

All information will be treated confidentially.

Investigators:

Prof. Khalid Alghamdi

Dr. Nuha Alfurayh

Dr. Mishary Al-mishary

\* Indicates required question

## Section 1:

---

Age \*

.....

Gender \*

Mark only one oval.

Male

Female

Level of practice \*

Mark only one oval.

General practitioner

Resident

Specialist

Consultant

Region of current practice \*

Mark only one oval.

Central region of Saudi Arabia

Eastern region of Saudi Arabia

Western region of Saudi Arabia

Southern region of Saudi Arabia

Northern region of Saudi Arabia

Working institution \*

Mark only one oval.

Primary health care center

Secondary care hospital

Tertiary hospital

**Practice \***

Mark only one oval.

- General practice
- Family medicine
- Others

**Place of your training (residency) \***

Mark only one oval.

- Saudi Arabia
- Outside Saudi Arabia
- No training

**Section 2:**

---

Have you ever heard about dermatologic surgery/cutaneous surgery as a subspecialty of dermatology? \*

Mark only one oval.

- Yes
- No

Who is the most qualified physician to perform each of the following procedures? \*

Mark only one oval per row.

|                                                                                                          | Dermatologic surgery     | Plastic Surgery          | Both are equal           | Other specialty          |
|----------------------------------------------------------------------------------------------------------|--------------------------|--------------------------|--------------------------|--------------------------|
| Removal of skin cysts                                                                                    | <input type="checkbox"/> | <input type="checkbox"/> | <input type="checkbox"/> | <input type="checkbox"/> |
| Excision of small (< 5 cm) skin tumors                                                                   | <input type="checkbox"/> | <input type="checkbox"/> | <input type="checkbox"/> | <input type="checkbox"/> |
| Excision of small Melanocytic nevus (< 5cm)                                                              | <input type="checkbox"/> | <input type="checkbox"/> | <input type="checkbox"/> | <input type="checkbox"/> |
| Filler injection for the facial aesthetics                                                               | <input type="checkbox"/> | <input type="checkbox"/> | <input type="checkbox"/> | <input type="checkbox"/> |
| Injection of botulinum toxins for facial wrinkles and localized hyperhidrosis of axilla, palms, or soles | <input type="checkbox"/> | <input type="checkbox"/> | <input type="checkbox"/> | <input type="checkbox"/> |
| Nail surgery                                                                                             | <input type="checkbox"/> | <input type="checkbox"/> | <input type="checkbox"/> | <input type="checkbox"/> |
| Laser procedure for Vascular and pigmentary lesions                                                      | <input type="checkbox"/> | <input type="checkbox"/> | <input type="checkbox"/> | <input type="checkbox"/> |
| Correction of traumatic, surgical and acne scars                                                         | <input type="checkbox"/> | <input type="checkbox"/> | <input type="checkbox"/> | <input type="checkbox"/> |
| Hair transplant                                                                                          | <input type="checkbox"/> | <input type="checkbox"/> | <input type="checkbox"/> | <input type="checkbox"/> |

During your training, have you had a rotation in dermatology clinics? \*

Mark only one oval.

- Yes
- No

Thank you for your participation.
